# Supplementary material for: From one to two: in situ construction of C3N5-poly(triazine imide) heterojunction for enhanced O2 activation
Source: Royal Society of Chemistry journal article supplement (doi:10.1039/d4cc05077k), 2024-01-01
Supplement: d4cc05077k1.pdf [file d4cc05077k1.pdf]

# *Electronic Supporting Information*

## **From one to two: In-site constructing C<sub>3</sub>N<sub>5</sub>-Poly (triazine imide) heterojunction for enhanced O<sub>2</sub> activation**

*Shiling Xu,<sup>a</sup> Ziheng Yang,<sup>a</sup> Laiqing Zhang,<sup>a</sup> Xiaorui Zhang,<sup>a</sup> Zikang Zeng,<sup>a</sup> Wenxuan Wang,<sup>a</sup> Yujun Liang,<sup>\*a</sup> Lan Yuan<sup>\*b</sup> and Chuang Han<sup>\*a</sup>*

<sup>a</sup>Faculty of Materials Science and Chemistry, China University of Geosciences, Wuhan 430074, China

<sup>b</sup>School of Chemistry and Chemical Engineering, Wuhan University of Science and Technology, Wuhan 430081, China

\*Corresponding author, E-mail: [yujunliang@sohu.com](mailto:yujunliang@sohu.com) (Yujun Liang); [yuanlan@wust.edu.cn](mailto:yuanlan@wust.edu.cn) (Lan Yuan) [hanc@cug.edu.cn](mailto:hanc@cug.edu.cn) (Chuang Han)

### **Contents list:**

#### **Experimental Section**

**Fig. S1** The SEM image of (a) C<sub>3</sub>N<sub>5</sub>. (b) PTI

**Fig. S2** TEM images of (a) C<sub>3</sub>N<sub>5</sub>-PTI and (b) C<sub>3</sub>N<sub>5</sub>. (c) HR-TEM images of C<sub>3</sub>N<sub>5</sub>-PTI.

**Fig. S3** N<sub>2</sub> adsorption-desorption isotherms.

**Fig. S4** (a) X-ray photoelectron spectra (XPS) of C<sub>3</sub>N<sub>5</sub>, PTI and C<sub>3</sub>N<sub>5</sub>-PTI. (b) FT-IR spectra of C<sub>3</sub>N<sub>5</sub>, C<sub>3</sub>N<sub>5</sub>-PTI and PTI.

**Fig. S5** Kubelka-Munk plots of (a) C<sub>3</sub>N<sub>5</sub> and (b) PTI. Mott-Schottky curves of (c) C<sub>3</sub>N<sub>5</sub> and (d) PTI.

**Fig. S6** Band structure alignment of C<sub>3</sub>N<sub>5</sub> and PTI.

**Fig. S7** (a) ESR spectra of C<sub>3</sub>N<sub>5</sub>-PTI, PTI and C<sub>3</sub>N<sub>5</sub> obtained in the presence of DMPO as an electron-trapping agent. (b) Photoluminescence (PL) spectra of as-samples in the presence of terephthalic acid (excitation wavelength: 320 nm). (c) The degradation of DPBF in C<sub>3</sub>N<sub>5</sub>, PTI and C<sub>3</sub>N<sub>5</sub>-PTI systems.

**Fig. S8** (a) The UPS spectra of C<sub>3</sub>N<sub>5</sub> and PTI, (b) Schematic illustration of the band positions for C<sub>3</sub>N<sub>5</sub> and PTI.

**Fig. S9** K<sub>f</sub>, K<sub>d</sub> fitting curve of (a) C<sub>3</sub>N<sub>5</sub>-PTI, (b) PTI and (c) C<sub>3</sub>N<sub>5</sub>, (d) H<sub>2</sub>O<sub>2</sub> decomposition rate of the prepared samples. (y=[H<sub>2</sub>O<sub>2</sub>], a=K<sub>f</sub>/K<sub>d</sub>, b=K<sub>d</sub>)

**Fig. S10** (a) The linear relationship of concentration of H<sub>2</sub>O<sub>2</sub> vs. UV-vis absorbance and (b) Standard curves for different concentration of H<sub>2</sub>O<sub>2</sub>

**Equation S1-2.**

**Table S1.** Surface area and pore information of the prepared samples.

**Table S2.** Comparison of photocatalytic H<sub>2</sub>O<sub>2</sub> yields over different semiconductor catalysts.

**References**

## Experimental Section:

**Materials.** 3-amino-1,2,4-triazole (3-AT, 99%, Energy Chemical), Potassium chloride (KCl, AR, Sinopharm), Lithium chloride (LiCl, 99%, Meryer), Potassium iodide (KI, AR, Sinopharm), Ammonium molybdate hydrate ( $\text{H}_{32}\text{Mo}_7\text{N}_6\text{O}_{28}$ , 99%, Energy Chemical), Ethanol ( $\text{C}_2\text{H}_5\text{OH}$ , AR, Sinopharm), Hydrogen peroxide (30%  $\text{H}_2\text{O}_2$ , AR, Sinopharm), Silver nitrate ( $\text{AgNO}_3$ , AR, Sinopharm), P-benzoquinone (p-BQ, AR, Sinopharm), 1,3-Diphenylisobenzofuran (DPBF, 96%, Bide), Terephthalic acid (TPA, 99%, Energy Chemical)

### Preparation.

#### (I) Preparation of $\text{C}_3\text{N}_5$ -PTI heterojunction nanomaterials

The  $\text{C}_3\text{N}_5$ -PTI heterojunction was synthesized by two-step thermal polycondensation of 3-amino-1,2,4-triazole (3-AT) with KCl and LiCl. 3-AT (2 g) was heated to 520 °C for 3 h at a rate of 3 °C/min in a muffle furnace. Then, 0.6 g sample was ground entirely with 6 g eutectic salt mixture of 2.7 g LiCl and 3.3 g KCl for 20 min. Next, the mixture was calcined to 500 °C for 3 h at a rate of 3 °C/min in a crucible under air. Following that, the collected samples were ground fully and followed by washing twice alternately with hot deionized water and ethanol to ensure the removal of remaining salts. Subsequently, the sample was dried at 60 °C overnight.

#### (II) Preparation of $\text{C}_3\text{N}_5$

$\text{C}_3\text{N}_5$  was synthesized by thermal polymerization of 3-AT. A porcelain crucible was loaded with 3-AT (2 g) and calcined at 520 °C for 3 h in air at a heating rate of 10 °C/min.

#### (III) Preparation of poly triazine imide (PTI)

Poly triazine imide (PTI) photocatalyst was synthesized via molten salt methods. 2 g of 3-AT was ground completely with 5 g eutectic salt mixture of 2.26 g LiCl and 2.74 g KCl for 20 min. Then, the mixture was calcined to 600 °C for 3 h at a rate of 10 °C/min in a crucible under air. The subsequent procedure was similar to  $\text{C}_3\text{N}_5$ -PTI.

### Characterization.

The phase and crystal structure of as-samples were observed by X-ray diffraction (XRD, AXS D8-Focus, Bruker, Germany) with the  $2\theta$  range from 5° to 60°. The morphology and microstructure of the samples were observed by transmission electron microscopy (TEM, Talos F200x, Thermo Fisher Scientific) and field emission scanning electron microscope (FE-SEM, SU8010, Hitachi, Japan). Elemental maps and energy dispersive (EDS) spectra of the catalysts were obtained by scanning electron microscopy. The X-ray photoelectron spectroscopy (XPS, K-alpha, Thermo Scientific, America) spectra were applied to analyze the element compositions and chemical states. The pore size, pore volume, and surface area of samples were obtained by the Brunauer-Emmett-Teller (BET, V-sorb 2800P, China) instrument. The light absorption characteristics of the prepared samples were analyzed by UV-Vis diffuse reflectance spectroscopy (DRS, UV-2550 PC). The photoluminescence (PL) spectra of the prepared samples were measured by a fluorescence spectrometer (Fluoromax-4 P, Horiba Jobin Yvon), using an emission wavelength of 365 nm. The free radicals of  $\bullet\text{O}_2^-$  were recorded on electron spin resonance (ESR, Bruker EMXplus-6/1) using DMPO as the spin-trapper agent. The electrochemical properties of samples were tested by an electrochemical workstation (CHI-760E,

Shanghai). The work function of samples was characterized by Ultraviolet photoelectron spectroscopy (UPS, PHI5000 VersaProbe III).

### **H<sub>2</sub>O<sub>2</sub> detection**

The photocatalytic hydrogen peroxide production reactions were performed under the 5W white LED lamp irradiation. In a typical operation, 5 mg of the photocatalysts were ultrasonically dissolved in 33 mL of aqueous solution containing 10 vol% ethanol by ultrasound. The obtained solution was stirred and air bubbled to obtain an oxygen environment. During the reaction, 2 mL of the suspension was collected every 15 min and the photocatalyst material was removed using a 0.22  $\mu$ L nylon needle filter. H<sub>2</sub>O<sub>2</sub> concentration was determined by the iodometric method. 1 mL of suspension was taken out and mixed with 2 mL of 0.1M KI and 0.05 mL of 0.01M H<sub>3</sub>Mo<sub>7</sub>N<sub>6</sub>O<sub>28</sub> solution. The absorbance was detected by UV-vis diffuse reflectance spectra. The concentration of H<sub>2</sub>O<sub>2</sub> was calculated by the equation given in **Fig. S10**.

### **H<sub>2</sub>O<sub>2</sub> decomposition detection methods**

The reaction conditions for the H<sub>2</sub>O<sub>2</sub> decomposition experiments were referred to previous works with minor revisions.<sup>1-3</sup> Specifically, experiments were carried out by adding 5 mg of the photocatalyst samples to 1 mL 8 mM H<sub>2</sub>O<sub>2</sub> solution without air bubbles. After 90 min of light exposure, 2 mL of the suspension was collected, and the photocatalytic material was removed using a 0.22  $\mu$ L nylon needle filter. The H<sub>2</sub>O<sub>2</sub> concentration was determined by the iodometric method and was used to assess the decomposition of H<sub>2</sub>O<sub>2</sub> by UV-Vis reflectance spectra.

### **Electrochemical measurements**

Electrochemical tests were performed on an electrochemical workstation (CHI-760E, Shanghai). The 10 mg catalyst was dispersed into 250  $\mu$ L ethanol, followed by 20  $\mu$ L Nafion solution (5 wt%), and then the mixture was ultrasonic for 20 min to achieve a homogeneous catalyst. Finally, the obtained catalyst was uniformly dripped onto the FTO conductive glass and dried to form a working electrode. Generally, the Ag/AgCl electrode is used as the reference electrode and the Pt wire as the counter electrode. 0.1 M Na<sub>2</sub>SO<sub>4</sub> solution was used as the electrolyte and a 300 W xenon lamp was used as the light source. In addition, the impedance test was measured using 0.5 M KCl solution and 5mM K<sub>3</sub>[Fe(CN)<sub>6</sub>]/K<sub>4</sub>[Fe(CN)<sub>6</sub>] as the electrolyte solution.

The position of the guide tape is calculated by the following formula:

$$E_{CB}=E_{fb}-0.1$$

$$E_{NHE}=E_{(Ag/AgCl)}+0.197$$

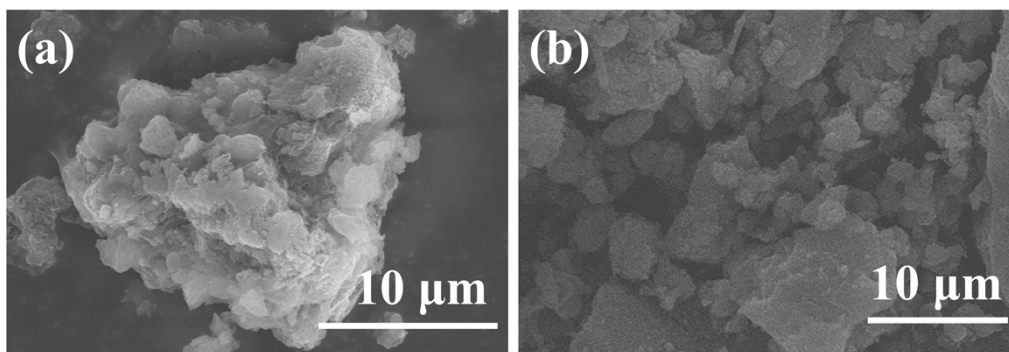

**Fig. S1** The SEM image of (a) C<sub>3</sub>N<sub>5</sub>. (b) PTI

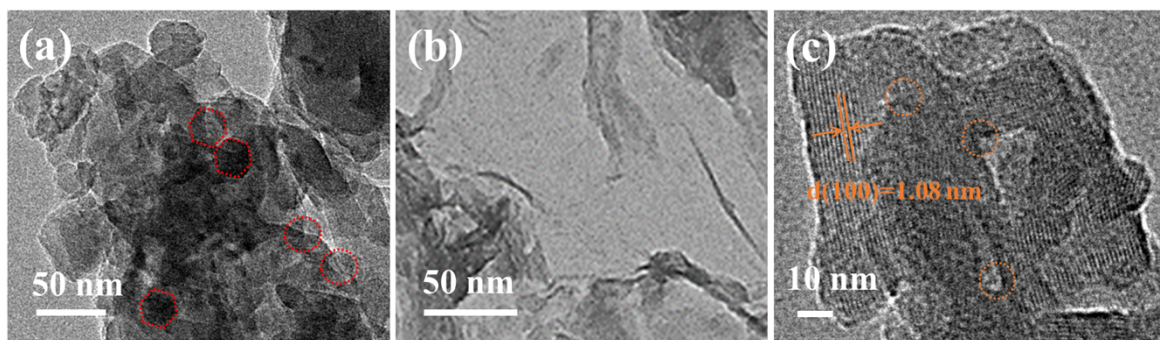

**Fig. S2** TEM images of (a) C<sub>3</sub>N<sub>5</sub>-PTI and (b) C<sub>3</sub>N<sub>5</sub>. (c) HR-TEM images of C<sub>3</sub>N<sub>5</sub>-PTI.

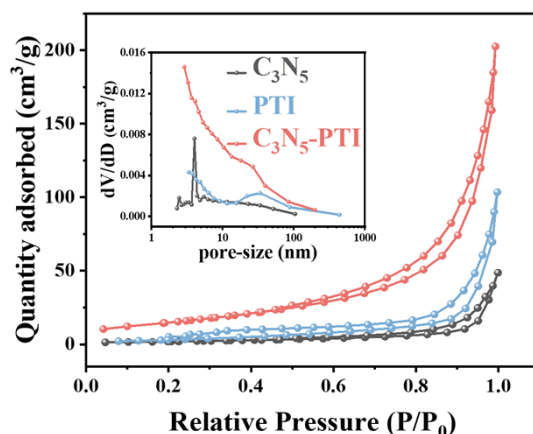

**Fig. S3** N<sub>2</sub> adsorption-desorption isotherms.

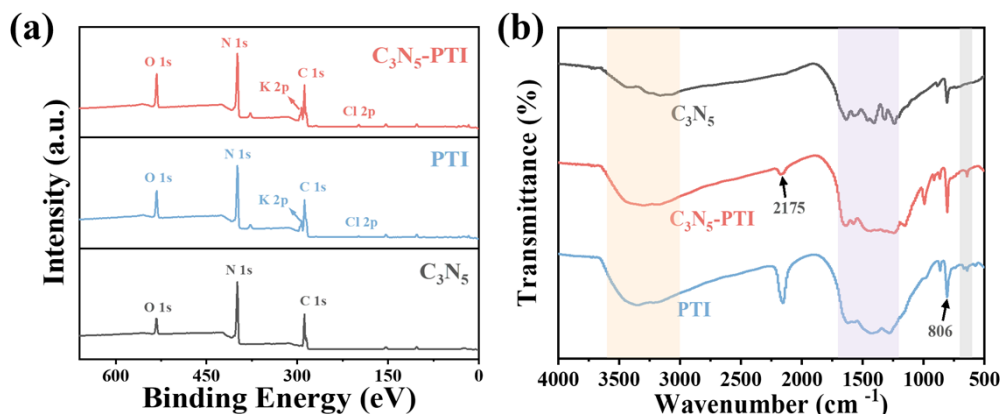

**Fig. S4** (a) X-ray photoelectron spectra (XPS) of C<sub>3</sub>N<sub>5</sub>, PTI and C<sub>3</sub>N<sub>5</sub>-PTI. (b) FT-IR spectra of C<sub>3</sub>N<sub>5</sub>, C<sub>3</sub>N<sub>5</sub>-PTI and PTI.

**Notes:** As shown in Fig. S4b, the distinctive stretching vibrations at band locations of 600-700 cm<sup>-1</sup> (shaded by grey) indicate the unique structure of the PTI.<sup>4</sup> The obvious adsorption peak at 806 cm<sup>-1</sup> corresponded to the out-of-plane bending vibration of the heptazine units,<sup>5</sup> while the broad peaks in the range of 3000-3600 cm<sup>-1</sup> (shaded by orange) were assignable to the absorbed H<sub>2</sub>O molecules and terminal amino groups.<sup>6</sup> Furthermore, the stretching vibration modes of C-N heterocycles were the source of the strongest absorption bands in the 1200-1700 cm<sup>-1</sup> area.<sup>7</sup> Notably, the spectra of the C<sub>3</sub>N<sub>5</sub>-PTI and PTI showed a clear peak at 2175 cm<sup>-1</sup>, which was attributed to the terminal cyano groups (-C≡N) produced by the 3-AT following ammonia loss during calcination in the alkali metal chloride molten solution.<sup>8</sup>

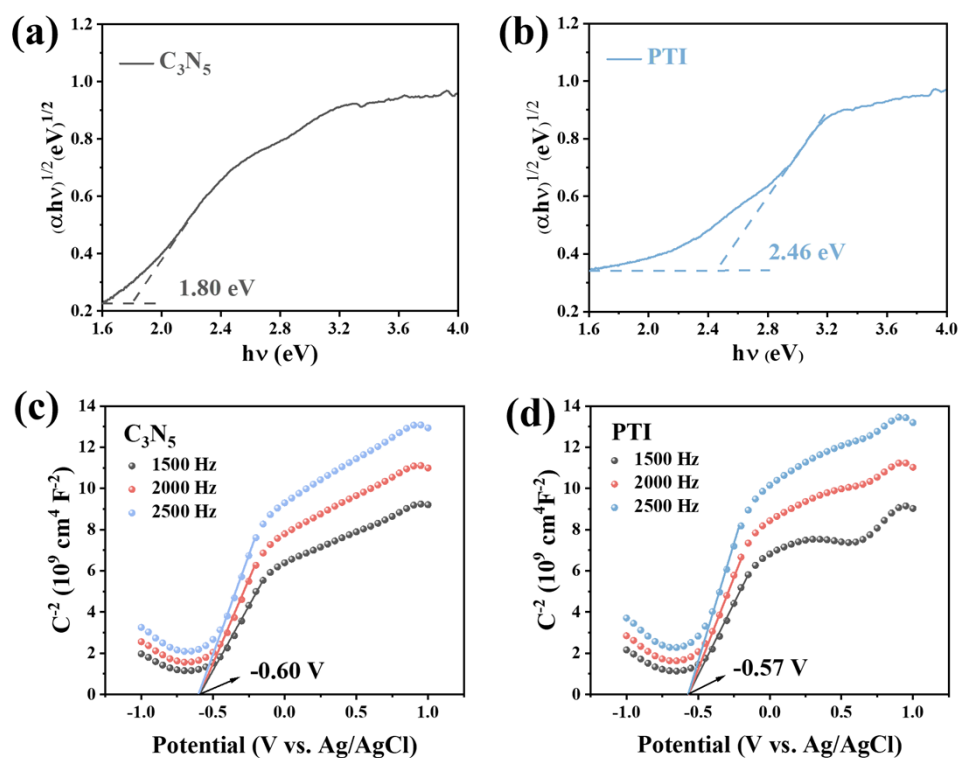

Fig. S5 Kubelka-Munk plots of (a)  $C_3N_5$  and (b) PTI. Mott-Schottky curves of (c)  $C_3N_5$  and (d) PTI.

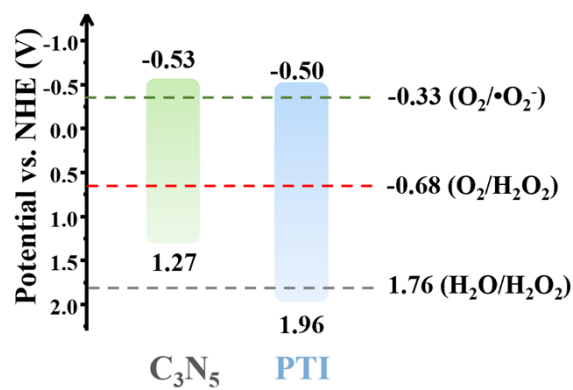

Fig. S6 Band structure alignment of  $C_3N_5$  and PTI.

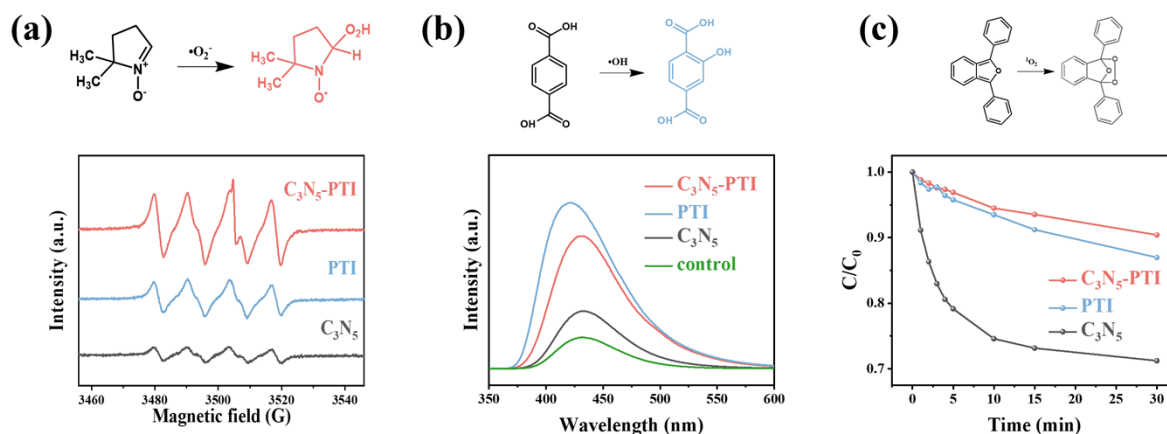

**Fig. S7** (a) ESR spectra of  $\text{C}_3\text{N}_5$ -PTI, PTI and  $\text{C}_3\text{N}_5$  obtained in the presence of DMPO as an electron-trapping agent. (b) Photoluminescence (PL) spectra of as-samples in the presence of terephthalic acid (excitation wavelength: 320 nm). (c) The degradation of DPBF in  $\text{C}_3\text{N}_5$ , PTI and  $\text{C}_3\text{N}_5$ -PTI systems.

**Notes:** As shown in Fig. S7, the dominant ROSs vary across different catalysts, which can be attributed to the following reasons. First, the oxidation potential of PTI is very positive (1.96 V), which is conducive to produce  $\cdot\text{OH}$  through oxidation of  $\text{H}_2\text{O}$  (1.9 V). Secondly, the synthesis temperature of  $\text{C}_3\text{N}_5$  material (520 °C) is relatively low in contrast to PTI (600 °C), and there are more surface functional groups, forming many defective states with low redox capability, which is unfavorable for charge transfer reactions for the production of  $\cdot\text{OH}$  and  $\cdot\text{O}_2^-$  while promoting the  $^1\text{O}_2$  production through energy transfer. Finally, for  $\text{C}_3\text{N}_5$ -PTI heterojunction, the charge transfer capability at the heterojunction interface is significantly enhanced, which facilitates the production of  $\text{H}_2\text{O}_2$  through consecutive two-step single-electron reduction of  $\text{O}_2$  (i.e.,  $\text{O}_2 + e^- \rightarrow \cdot\text{O}_2^-$ ,  $\cdot\text{O}_2^- + e^- + 2\text{H}^+ \rightarrow \text{H}_2\text{O}_2$ ) and one-step two-electrons reduction of  $\text{O}_2$  (i.e.,  $\text{O}_2 + e^- + 2\text{H}^+ \rightarrow \text{H}_2\text{O}_2$ ).

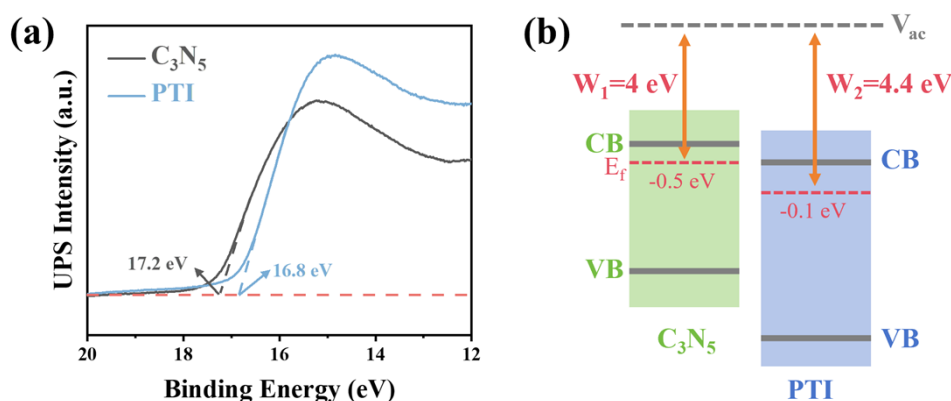

**Fig. S8** (a) The UPS spectra of  $\text{C}_3\text{N}_5$  and PTI, (b) Schematic illustration of the band positions for  $\text{C}_3\text{N}_5$  and PTI.

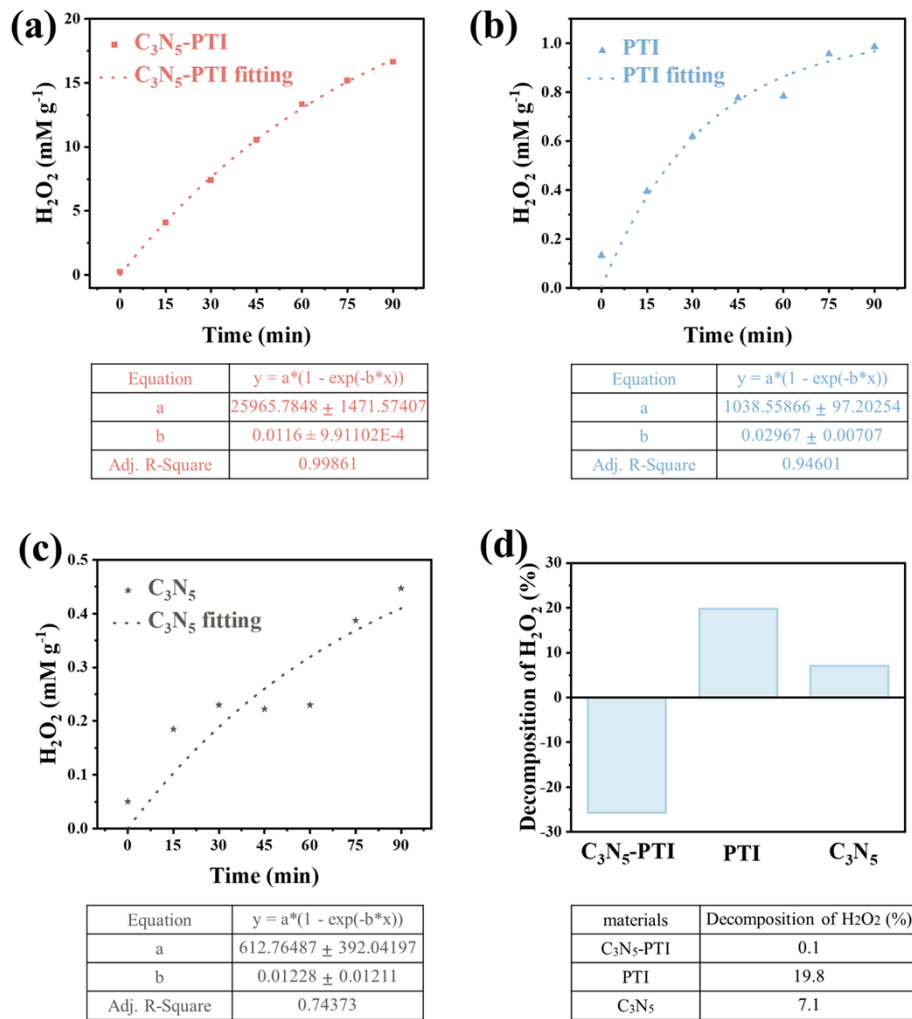

**Fig. S9**  $K_f$ ,  $K_d$  fitting curve of (a)  $\text{C}_3\text{N}_5$ -PTI, (b) PTI and (c)  $\text{C}_3\text{N}_5$ , (d)  $\text{H}_2\text{O}_2$  decomposition rate of the prepared samples. ( $y=[\text{H}_2\text{O}_2]$ ,  $a=K_f/K_d$ ,  $b=K_d$ )

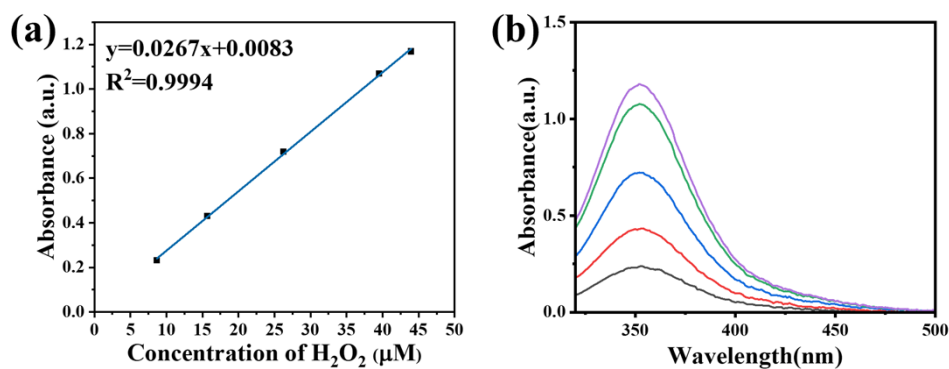

**Fig. S10** (a) The linear relationship of concentration of  $\text{H}_2\text{O}_2$  vs. UV-vis absorbance and (b) Standard curves for different concentration of  $\text{H}_2\text{O}_2$



**Equation S1:**

$$\frac{1}{C^2} = \frac{2}{e\epsilon\epsilon_0 N_D} \left( -E + E_{fb} - \frac{KT}{e} \right) \quad (1)$$

Where C, e,  $\epsilon$ ,  $\epsilon_0$ ,  $N_D$ , E,  $E_{fb}$ , K and T represent the capacitance of the space charge layer, the electron charge, the relative permittivity, the vacuum permittivity, the donor density, the applied potential, the flat-band potentials, the Boltzmann constant and the thermodynamic temperature, respectively.<sup>9</sup>

**Equation S2:**

$$[H_2O_2] = \frac{K_f}{K_d} \times \{1 - \exp(-K_d \times t)\} \quad (2)$$

Where  $[H_2O_2]$ ,  $K_f$ ,  $K_d$  and t represent the hydrogen peroxide concentration, the formation rate constant, the decomposition rate constant, the reaction time, respectively. Zero-order and first-order kinetic studies were used to simulate the decomposition behavior of  $H_2O_2$  on all samples.<sup>10</sup>

**Table S1.** Surface area and pore information of the prepared samples.

| Samples                            | Surface area (m <sup>2</sup> g <sup>-1</sup> ) | Adsorption cumulative volume (cm <sup>3</sup> g <sup>-1</sup> ) | BJH Adsorption average pore width (nm) |
|------------------------------------|------------------------------------------------|-----------------------------------------------------------------|----------------------------------------|
| C <sub>3</sub> N <sub>5</sub>      | 7.2638                                         | 0.07746                                                         | 13.94                                  |
| PTI                                | 13.3457                                        | 0.166563                                                        | 13.18                                  |
| C <sub>3</sub> N <sub>5</sub> -PTI | 55.6896                                        | 0.328717                                                        | 8.12                                   |

**Table S2.** Comparison of photocatalytic H<sub>2</sub>O<sub>2</sub> yields over different semiconductor catalysts.

| Materials                                                            | Atmosphere     | Formed H <sub>2</sub> O <sub>2</sub> | Reaction system                                                | Irradiation conditions                                          | Ref.      |
|----------------------------------------------------------------------|----------------|--------------------------------------|----------------------------------------------------------------|-----------------------------------------------------------------|-----------|
| C <sub>3</sub> N <sub>5</sub> -PTI                                   | Air            | 1675 μmol/g<br>(90 min)              | Catalyst: 5 mg<br>Scavenger: 10 vol.% EtOH                     | 5W white LED lamp<br>(72.9 mW/cm <sup>2</sup> )                 | This work |
| g-C <sub>3</sub> N <sub>4</sub><br>Nanosheet                         | Air            | 43.07 μmol/g/h                       | Catalyst: 0.03 g<br>Scavenger: IPA                             | λ=400-700 nm                                                    | 11        |
| C <sub>3</sub> N <sub>5</sub> /TiO <sub>2-x</sub>                    | O <sub>2</sub> | 2.93<br>μmol/L/min                   | Catalyst: 4 cm <sup>-1</sup><br>Scavenger: 10 vol.% EtOH       | 300 W Xe lamp                                                   | 12        |
| g-C <sub>3</sub> N <sub>4</sub>                                      | O <sub>2</sub> | 170 μmol/L/h                         | Catalyst: 0.1 g                                                | 300 W Xe lamp                                                   | 13        |
| 2%Bi/Bi <sub>2</sub> O <sub>3</sub> @g-C <sub>3</sub> N <sub>4</sub> | O <sub>2</sub> | 92.51 μmol/L/h                       | Catalyst: 50 mg                                                | λ>420 nm                                                        | 14        |
| CN-S                                                                 | O <sub>2</sub> | 201.45<br>μmol/g/h                   | Catalyst: 20 mg<br>Scavenger: 0.1 mmol                         | 20 W LED lamp<br>(420 nm)                                       | 15        |
| g-C <sub>3</sub> N <sub>4</sub><br>nanosheets                        | O <sub>2</sub> | 1083 μmol/g/h                        | Catalyst: 0.05 g<br>Scavenger: 10 vol.% EtOH                   | Simulated sunlight<br>(filter: AM1.5)                           | 16        |
| CN/rGO@<br>BPQDs-0.04                                                |                | 181.69 μmol/L<br>(3 h)               | Catalyst: 50 mg                                                | 300 W Xe lamp<br>(λ=420-780 nm)                                 | 17        |
| g-C <sub>3</sub> N <sub>4</sub> /PDI                                 | O <sub>2</sub> | 30 μmol (48 h)                       | Catalyst: 50 mg                                                | λ>420 nm<br>(26.9 W/m <sup>2</sup> )                            | 18        |
| CN/Zn-OAC                                                            | O <sub>2</sub> | 77.5 μmol/h                          | Catalyst: 10 mg<br>Scavenger: 20 vol.% EtOH                    | 300 W Xe lamp<br>(λ>400 nm)                                     | 19        |
| C≡N-CN/IS/6%<br>Ppy                                                  | O <sub>2</sub> | 895 μmol/L/h                         | Catalyst: 50 mg<br>Scavenger: 10 vol.% IPA                     | 300 W Xe lamp<br>(λ>420 nm)                                     | 20        |
| s-B <sub>0.3</sub> CN                                                | O <sub>2</sub> | 108.4 μM (2 h)                       | Catalyst: 30 mg                                                | 300 W Xe lamp<br>(λ≥420 nm)                                     | 21        |
| Cv-PCNNS                                                             | O <sub>2</sub> | 984.8 μmol/L/h                       | Catalyst: 50 mg<br>Scavenger: 10 vol.% IPA                     | 300 W Xe lamp (λ=420<br>nm, 140 mW/cm <sup>2</sup> )            | 22        |
| PCN-NV <sub>C</sub>                                                  | O <sub>2</sub> | 25.1 μmol/h                          | Catalyst: 50 mg<br>Scavenger: 10 vol.% MeOH                    | 300 W Xe lamp<br>(λ>420 nm)                                     | 23        |
| UiO-66-B                                                             | O <sub>2</sub> | 1002 μmol/g/h                        | Catalyst: 30 mg/100 mL<br>Scavenger: 10 vol.% IPA              | 300 W Xe lamp<br>(filter: AM1.5)                                | 24        |
| NH <sub>2</sub> -MIL-125                                             | O <sub>2</sub> | 917 μmol/g/h                         | Catalyst: 5 mg/20 mL                                           | 500 W Xe lamp<br>(λ>420 nm)                                     | 25        |
| ZnO/PDA                                                              |                | 1011.4<br>μmol/L/h                   | Catalyst: 20 mg/50 mL<br>Scavenger: Glycol                     | 300 W Xe lamp                                                   | 26        |
| Pd/A/BiVO <sub>4</sub>                                               | O <sub>2</sub> | 805.9 μmol/g/h                       | Catalyst: 100 mg/100 mL                                        | 300 W Xe lamp<br>(λ>420 nm, 0.4<br>W/cm <sup>2</sup> )          | 27        |
| Au/WO <sub>3</sub>                                                   |                | 544 μM (5 h)                         | Catalyst: 50 mg/50 mL<br>Scavenger: 4 vol.% CH <sub>3</sub> OH | 400 W metal halide<br>lamp (λ≥420 nm, 4<br>mW/cm <sup>2</sup> ) | 28        |
| SI-PIL-TiO <sub>2</sub>                                              | O <sub>2</sub> | 1601 μmol/g/h                        | Catalyst: 10 mg/50 mL LEV                                      | 250 W Xe lamp                                                   | 29        |
| CuFe <sub>2</sub> O <sub>4</sub> /ZnIn <sub>2</sub> S <sub>4</sub>   | O <sub>2</sub> | 2545.4 μmol/g                        | Catalyst: 1 g<br>50 mL ethanol+45 mL pure water                | 350 W Xe lamp<br>(λ>420 nm)                                     | 30        |

## References:

- 1 J. Yuan, N. Tian, Z. Zhu, W. Yu, M. Li, Y. Zhang, H. Huang, *Chem. Eng. J.*, 2023, **467**, 143379.
- 2 F. He, Y. Lu, Y. Wu, S. Wang, Y. Zhang, P. Dong, Y. Wang, C. Zhao, S. Wang, J. Zhang, S. Wang, *Adv. Mater.*, 2024, **36**, 2307490.
- 3 Y. Luo, C. Liu, J. Liu, X. Liu, Y. Zhou, X. Ou, B. Weng, J. Jiang, B. Han, *Chem. Eng. J.*, 2024, **481**, 148494.
- 4 X. Liang, S. Xue, C. Yang, X. Ye, Y. Wang, Q. Chen, W. Lin, Y. Hou, G. Zhang, M. Shalom, Z. Yu, X. Wang, *Angew. Chem. Int. Ed.*, 2023, **62**, e202216434.
- 5 Y. Shen, X. Du, Y. Shi, L.J. Nguetsa Kuate, Z. Chen, C. Zhu, L. Tan, F. Guo, S. Li, W. Shi, *Adv. Powder Mat.*, 2024, **3**, 100202.
- 6 J. Yang, Y. Liang, K. Li, G. Yang, K. Wang, R. Xu, X. Xie, *Appl. Catal. B*, 2020, **262**, 118252.
- 7 B. Zhai, H. Li, G. Gao, Y. Wang, P. Niu, S. Wang, L. Li, *Adv. Funct. Mater.*, 2022, **32**, 2207375.
- 8 H. Liang, A. Wang, R. Cheng, F. Chen, P. Kannan, C. Molochas, P. Tsiakaras, *Chem. Eng. J.*, 2024, **489**, 151145.
- 9 J. Yang, Y. Liang, K. Li, G. Yang, K. Wang, R. Xu and X. Xie, *Appl. Catal. B*, 2020, **262**, 118252.
- 10 W. Liu, P. Wang, J. Chen, X. Gao, H. Che, B. Liu and Y. Ao, *Adv. Funct. Mater.*, 2022, **32**, 2205119.
- 11 W. Liu, C. Song, M. Kou, Y. Wang, Y. Deng, T. Shimada and L. Ye, *Chem. Eng. J.*, 2021, **425**, 130615.
- 12 W. Gan, X. Fu, J. Jin, J. Guo, M. Zhang, R. Chen, C. Ding, Y. Lu, J. Li and Z. Sun, *J. Colloid Interface Sci.*, 2024, **653**, 1028-1039.
- 13 Z. Zhu, H. Pan, M. Murugananthan, J. Gong and Y. Zhang, *Appl. Catal. B*, 2018, **232**, 19-25.
- 14 X. Yan, G. Yu, C. Xing, Y. Hu, H. Liu and X. Li, *Catal. Sci. Technol.*, 2023, **13**, 3094-3105.
- 15 B. Zhang, S. Wang, C. Qiu, Y. Xu and J. Zuo, *Appl. Surf. Sci.*, 2022, **573**, 151506.
- 16 L. Zhou, J. Feng, B. Qiu, Y. Zhou, J. Lei, M. Xing, L. Wang, Y. Zhou, Y. Liu and J. Zhang, *Appl. Catal. B*, 2020, **267**, 118396.
- 17 J. Xiong, X. Li, J. Huang, X. Gao, Z. Chen, J. Liu, H. Li, B. Kang, W. Yao and Y. Zhu, *Appl. Catal. B*, 2020, **266**, 118602.
- 18 Y. Shiraishi, S. Kanazawa, Y. Kofuji, H. Sakamoto, S. Ichikawa, S. Tanaka and T. Hirai, *Angew. Chem., Int. Ed.*, 2014, **53**, 13454-13459.
- 19 Y. Li, Y. Guo, G. Fan, D. Luan, X. Gu and X. Lou, *Angew. Chem., Int. Ed.*, 2024, **63**, e202317572.
- 20 R. Li, K. Ba, D. Zhang, Y. Shi, C. Li, Y. Yu and M. Yang, *Small*, 2024, **20**, 2308568.
- 21 Z. Zhang, P. Luo, L. Gan, Y. Zhao, X. Wang, H. Peng and J. Peng, *Appl. Surf. Sci.*, 2024, **649**, 159118.
- 22 R. Li, M. Zheng, X. Zhou, D. Zhang, Y. Shi, C. X. Li and M. Yang, *Chem. Eng. J.*, 2023, **464**, 142584.
- 23 F. Lin, T. Wang, Z. Ren, X. Cai, Y. Wang, J. Chen, J. Wang, S. Zang, F. Mao and L. Lv, *J. Colloid Interface Sci.*, 2023, **636**, 223-229.
- 24 Y. Li, F. Ma, L. Zheng, Y. Liu, Z. Wang, P. Wang, Z. Zheng, H. Cheng, Y. Dai, B. Huang, *Mater. Horiz.*, 2021, **8**, 2842-2850.
- 25 Y. Zheng, H. Zhou, B. Zhou, J. Mao, Y. Zhao, *Catal. Sci. Technol.*, 2022, **12**, 969-975.
- 26 G. Han, F. Xu, B. Cheng, Y. Li, J. Yu, L. Zhang, *Acta Phys. - Chim. Sin.*, 2022, **38**, 1-10.
- 27 M. Sun, X. Wang, Y. Li, H. Pan, M. Murugananthan, Y. Han, J. Wu, M. Zhang, Y. Zhang, Z. Kang, *ACS Catal.*, 2022, **12**, 2138-2149.
- 28 Y. Wang, Y. Wang, J. Zhao, M. Chen, X. Huang, Y. Xu, *Appl. Catal. B Environ.*, 2021, **284**, 119691.
- 29 Y. Cheng, J. Jin, H. Yan, G. Zhou, Y. Xu, L. Tang, X. Liu, H. Li, K. Zhang, Z. Lu, *Angew. Chem. Int. Ed.*, 2024, **63**, e202400857.
- 30 D. Liu, L. Jiang, D. Chen, Z. Hao, B. Deng, Y. Sun, X. Liu, B. Jia, L. Chen, H. Liu, *Chem. Eng. J.*, 2024, **482**, 149165.
